# Supplementary material for: CIS QDs nucleated on oxygen vacancy rich BOI microplates: a hybrid photocatalyst with enhanced green energy production via mediator free Z-scheme dynamics
Source: Royal Society of Chemistry journal article supplement (doi:10.1039/d2ya00046f), 2022-01-01
Supplement: d2ya00046f1.pdf [file d2ya00046f1.pdf]

**Electronic Supporting Information (ESI)**

**CIS QDs Nucleated on Oxygen Vacancy rich BOI Microplates: A Hybrid Photocatalyst  
with Enhanced Green Energy Production via Mediator free Z-scheme Dynamic**

**Deeptimayee Prusty, Sriram Mansingh and K.M. Parida\***

**Centre for Nanoscience and Nanotechnology, Siksha 'O' Anusandhan (Deemed to be  
University), Bhubaneswar-751030, Odisha (India)**

\*Corresponding author

E-mail: [paridakulamani@yahoo.com](mailto:paridakulamani@yahoo.com) &

[kulamaniparida@soa.ac.in](mailto:kulamaniparida@soa.ac.in)

---

**Experimental section**

## **Chemicals Requirement**

Copper chloride dihydrate ( $\text{CuCl}_2 \cdot 2\text{H}_2\text{O}$ , 99%), Thioglycolic acid (TGA, 79%), Potassium iodide (KI, >99.5%), sodium hydroxide (NaOH, 97%), NBT (nitro blue tetrazolium chloride), Methanol, Nafion,  $\text{Na}_2\text{SO}_4$ , TA (Terephthalic Acid) were purchased from Merck and Bismuth nitrate pentahydrate ( $\text{Bi}(\text{NO}_3)_3 \cdot 5\text{H}_2\text{O}$ , 98%), Indium chloride ( $\text{InCl}_3$ , 98%), sodium sulfide nonahydrate ( $\text{Na}_2\text{S} \cdot 9\text{H}_2\text{O}$ , 58%),  $\text{AgNO}_3$ ,  $\text{FeCl}_3 \cdot 6\text{H}_2\text{O}$  from Himedia chemical company. All reagents are in analytical grade and are used in reaction without further purification.

## **Synthetic Method**

### **Synthesis of Bismuth Oxyiodide Micro-Plate (BOI MP)**

2D BOI MPs were fabricated via hydrolysis method at ambient temperature. Herewith, 0.0028 mol of  $\text{Bi}(\text{NO}_3)_3 \cdot 5\text{H}_2\text{O}$  was added into 20.0 mL (0.140 mol/L) of aqueous KI solution with stirring. After 2 min of sonication, the suspension undergoes 5h of constant stirring. A brick-red colorization was attained, which was filtered along with washing frequently by ethanol and water. Afterward, it was dried for 8 h at  $60^\circ\text{C}$  to obtain BOI MPs. The overall synthetic method is represented schematically in scheme 1.

### **Synthesis of $\text{CuInS}_2$ Quantum dot (CIS QD)**

The  $\text{CuInS}_2$  ternary QD was synthesized in a single pot reflux method. In a two-necked round-bottom-flask, appropriate amount of  $\text{CuCl}_2 \cdot 2\text{H}_2\text{O}$ ,  $\text{InCl}_3 \cdot 4\text{H}_2\text{O}$  as copper, indium precursors respectively and TGA as capping ligand were taken and dissolved into water. The pH of the above solution was accustomed to 8.5 by adding 1M NaOH solution. Aqueous solution of  $\text{Na}_2\text{S} \cdot 9\text{H}_2\text{O}$  as a sulfur source was introduced into the round-bottom-flask and the entire solution was refluxed for 4 h at  $100^\circ\text{C}$ . Then after 4 h, the solution was precipitated by adding ethanol and was dehydrated at  $40^\circ\text{C}$  under vacuum to obtain ternary CIS QD.

## Synthesis of CuInS<sub>2</sub>-BiOI (CIS-BOI) Composite

The CuInS<sub>2</sub>-BOI hybrid was synthesized *via*. reflux strategy by in-situ insertion of the as-prepared BOI MP. In a two-necked round-bottom-flask, appropriate amount of CuCl<sub>2</sub>·2H<sub>2</sub>O, InCl<sub>3</sub>·4H<sub>2</sub>O as copper, indium precursors respectively and TGA as capping ligand were taken and dissolved into water. The pH of the above solution was accustomed to 8.5 by adding 1M NaOH solution. Aqueous solution of Na<sub>2</sub>S·9H<sub>2</sub>O as a sulfur source was introduced into the round-bottom-flask. A certain amount of as-prepared BOI was inserted with constant stirring and the entire solution was refluxed for 4 h at 100°C. Then after 4 h, the solution was precipitated by adding ethanol and was dehydrated at 40°C under vacuum to obtain CIS-BOI binary hybrid. Likewise, CIS-BOI composites at various weight percentages were synthesized by following the same procedure. The overall synthesis process is represented in Scheme. S1.

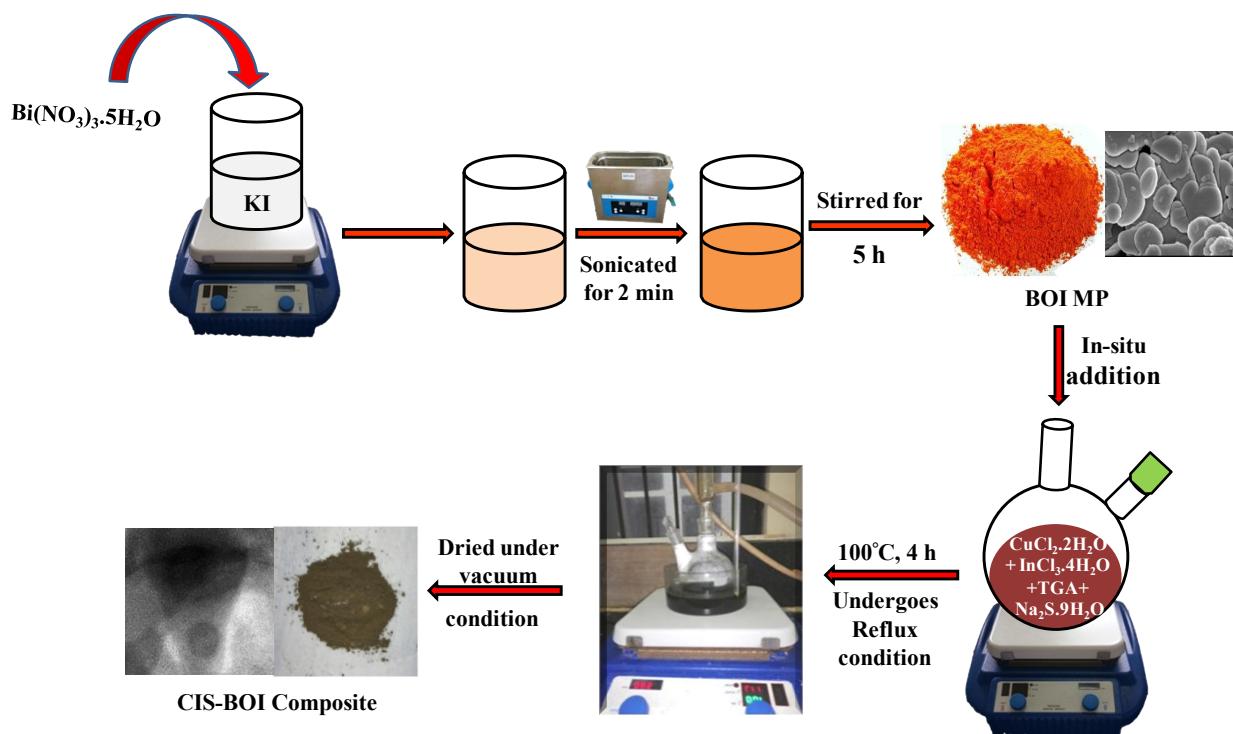

Scheme. S1: Overall in-situ synthesis scheme for CIS-BOI composite.

## Characterization techniques

Structural characterization of the as-prepared samples was analyzed by XRD (X-Ray Diffraction), FESEM (Field-Emission-Scanning-Electron-Microscopy), HRTEM (High-Resolution-Transmission-Electron-Microscopy), XPS (X-ray photoelectron-spectroscopy) and Raman analysis. The crystallinity nature and phase purity of the photocatalysts were anticipated by powder XRD technique with a RigakuUltima-IV X-ray diffractometer (40 KV/40 mA), outfitted with Cu K $\alpha$  radiation ( $\lambda = 1.54 \text{ \AA}$ ) at a  $2\theta$  range of 10-60°. XPS was executed with VG Microtech Multilab ESCA 3000 spectrometer via non-monochromatic K $\alpha$  Mg X-ray supply to analyze surface elemental states and chemical composition of the sample. C 1s with binding energy 284.8 eV is taken reference for spectral calibration. The morphology of CIS QD on BOI MP surface was studied by FESEM analysis (FEI Quanta 400FEG\_SEM). The internal structure and particle size of the as synthesized materials were analyzed by 200 kV HRTEM (analyzer JEOL-2100 JEOL). Raman spectrometer is used to know the composite formation and oxygen vacancy of the material. Here we used a laser of 332 nm RENISHAW via Raman spectrometer. The optical property of the as-prepared samples was carried out by UV-Vis DRS (UV- visible diffuse reflectance spectroscopy) and PL (Photoluminescence) spectroscopy. The UV-Vis DRS spectra of the prepared samples were deliberated by JASCO-V-750 UV-Vis spectrophotometer in a wavelength range of 200-800 nm (BaSO<sub>4</sub> as reference), to study the absorbance and bandgap energy of the pristine and composite materials. The Photoluminescence (PL) excitation and emission spectra were analyzed with a JASCO-FP-8300 fluorescence spectrometer where Xe- lamp is used as excitation source. The excitation and emission spectra were recorded in a range of 500- 640 nm and 420- 500 nm respectively. The electrochemical measurement were carried out via multi-channel-Iviumpotentiostat analyzer with a three electrode system which consists of Ag/AgCl as reference electrode, platinum as counter electrode and the as-prepared sample as a working

electrode. A solution of 0.1 M  $\text{Na}_2\text{SO}_4$  with a pH of 6.8 was used as electrolyte for electrochemical measurements. Light illumination can be carried out by taking 300 W Xenon lamps fitted with 400 nm cut-off filter.

### **Photocatalytic $\text{H}_2$ Evolution**

Furthermore, the photocatalytic activity of the as-synthesized samples was deliberated for hydrogen generation. The photocatalytic reaction was executed in a 100 mL quartz-set reactor. Typically, 20mg of catalyst was put into the reactor containing 20 mL of 10 volume percent aqueous methanol solution (as hole scavenger). 125W Xe-lamp of wavelength larger than 420nm was used as a source of visible-light in photo-reactor and was placed at 1.5 cm distance away from the catalyst. Then, the solution was constantly stirred throughout the reaction to avoid settling of catalyst. Before the light-irradiation, the catalytic mixed suspension undergoes nitrogen gas purging for 30mins to eliminate all the dissolved-oxygen and then for another 30mins in dark condition for the establishment of adsorption-desorption equilibrium. After light irradiation for 1h, the evolved gas was collected by water displacement technique. Afterward, the gas was identified by using GC-7890B coupled with TCD (thermal conductivity detector) and 5 Å molecular sieves. As blank experiment, no hydrogen gas evolution was observed in absence of light and catalyst; authenticate the significance of catalyst and light in a photo-catalytic reaction.

### **Photocatalytic $\text{O}_2$ Evolution**

More to the point, the photocatalytic  $\text{O}_2$  evolution ability of pristine BOI, CIS QD and the best composite material (15% CIS-BOI) was studied by using the same light source with different electron scavengers. Here, 20 mg of photocatalyst was taken in the photo-reactor containing 20 mL of 0.05M aqueous  $\text{AgNO}_3$  and  $\text{FeCl}_3$  solution differently. After light illumination of 1 h, the generated gas was accumulated by water displacement method. Subsequently the gas was collected

by using GC-7890B coupled with TCD (thermal conductivity detector) and 5 Å molecular sieves. As blank experiment, no oxygen gas evolution was observed in absence of light illumination and catalyst; validate the importance of light and catalyst in photo-catalytic reaction.

### Fabrication of working electrodes:

Working electrodes were fabricated through dropcast technique by taking 0.5 mg of the as-prepared materials. The synthesized material was dispersed into 0.7 mL ethanol with 40 µL nafion solution. Then the suspension was sonicated for 7min to obtain a homogeneous mixture. After that the solution was dropcasted on the conducting side of a FTO (Fluorine Doped Tin Oxide) of area 1 cm<sup>2</sup>. Then the catalyst loaded FTO was dried in a vacuum-oven overnight at room temperature for electrochemical study.

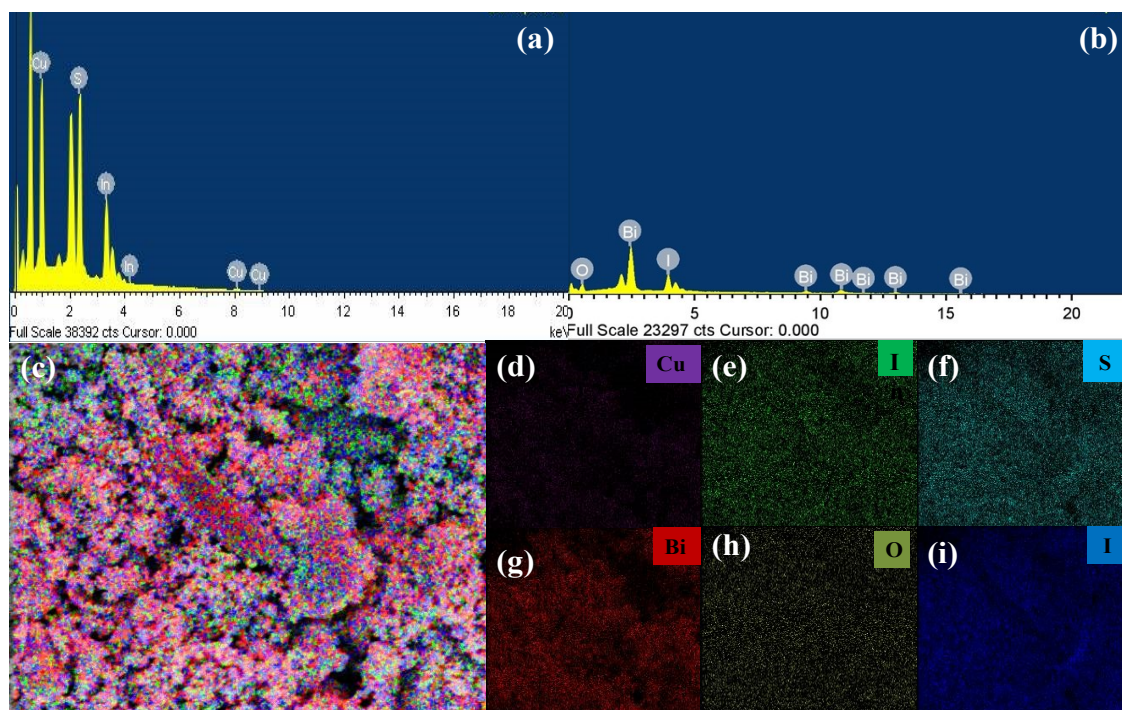

Fig. S1: EDX pattern of (a) CIS, (b) BOI; Elemental color-mapping image of (c) 15% CIS-BOI composite, (d) Cu, (e) In, (f) S, (g) Bi, (h) O, and (i) I elements.

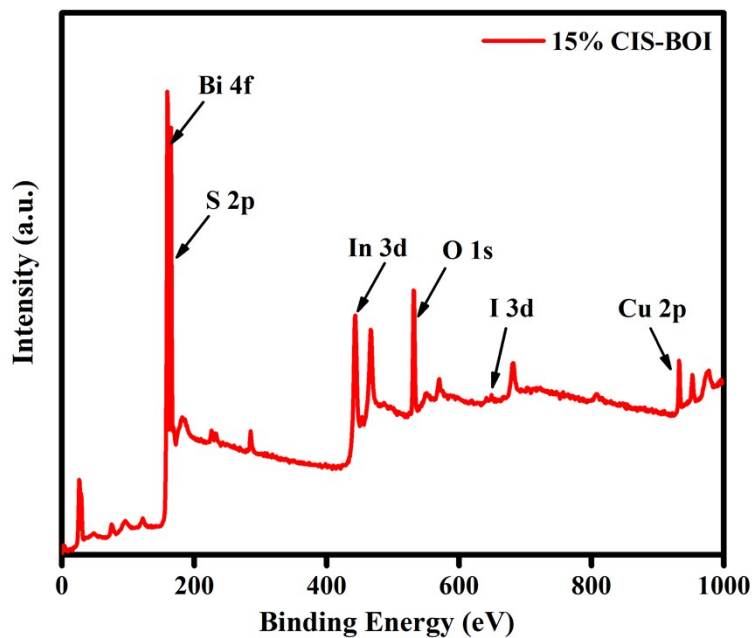

Fig. S2: XPS Survey of 15% CIS-BOI Composite.

Table: S1 comparison in binding energy of the elements in (a) neat BOI and 15% CIS-BOI, (b) neat CIS and 15% CIS-BOI

| (a) | Elements                         | Binding energy in BOI            | Binding energy in 15% CIS-BOI | (b)                  | Elements             | Binding energy in CIS | Binding energy in 15% CIS-BOI |
|-----|----------------------------------|----------------------------------|-------------------------------|----------------------|----------------------|-----------------------|-------------------------------|
|     | Bi                               | 159.2 eV<br>164.0 eV             | 159.4 eV<br>164.6 eV          |                      | Cu                   | 932.7 eV<br>952.6 eV  | 932.3 eV<br>952.2 eV          |
| O   | 528.9 eV<br>531.4 eV<br>532.6 eV | 529.1 eV<br>531.6 eV<br>532.8 eV | In                            | 445.1 eV<br>452.8 eV | 444.6 eV<br>452.6 eV |                       |                               |
| I   | 618.7 eV<br>630.2 eV             | 618.9 eV<br>630.4 eV             | S                             | 158.6 eV<br>164.0 eV | 158.1 eV<br>163.6 eV |                       |                               |

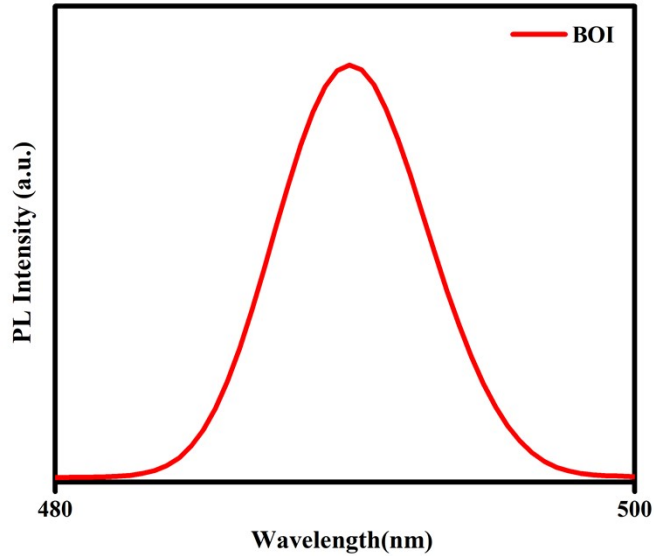

Fig. S3: PL emission spectra of pristine BOI.

## H<sub>2</sub> Evolution

### Calculation of Apparent Conversion Efficiency (ACE) of 15% CIS-BOI composite <sup>1</sup>

$$\text{ACE} = \frac{\text{Stored chemical energy}}{\text{Incident light intensity}} \times 100$$

$$\Rightarrow \text{Stored chemical energy} = \text{moles of H}_2 \text{ produced} \times \Delta H_c$$

$$= 0.1709 \times 10^{-6} \mu\text{mols}^{-1} \times 285.8 \text{ KJmol}^{-1} = 0.0487 \text{ Js}^{-1} \text{ or W}$$

$$\Rightarrow \text{Incident light intensity} = 70 \text{ mW cm}^{-2}$$

$$\times (\text{Area of the spherical surface where light falls})$$

$$= 70 \text{ mW cm}^{-2} \times 3.141 \times 1.5 \text{ cm} \times 1.5 \text{ cm} = 0.4947 \text{ W}$$

$$\Rightarrow \text{ACE} = \frac{0.0487 \text{ W}}{0.4947 \text{ W}} \times 100 = 9.84\%$$

Where,  $\Delta H_c$  = Heat of combustion of hydrogen = 285.8 kJ/mol.

### Calculation of ACE of pristine CIS QD



$$\text{ACE} = \frac{\text{Stored chemical energy}}{\text{Incident light intensity}} \times 100$$

$$\Rightarrow \text{Stored chemical energy} = \text{moles of H}_2 \text{ produced} \times \Delta H_c$$

$$= 0.0644 \mu\text{mol s}^{-1} \times 285.8 \text{ kJ mol}^{-1} = 0.0184 \text{ J s}^{-1} \text{ or W}$$

$$\Rightarrow \text{Incident light intensity} = 70 \text{ mW cm}^{-2}$$

$$\times (\text{Area of the spherical surface where light falls})$$

$$= 70 \text{ mW cm}^{-2} \times 3.141 \times 1.5 \text{ cm} \times 1.5 \text{ cm} = 0.4947 \text{ W}$$

$$\Rightarrow \text{ACE} = \frac{0.0184 \text{ W}}{0.4947 \text{ W}} \times 100 = 3.72\%$$

Where,  $\Delta H_c$  = Enthalpy of combustion of  $\text{H}_2 = 285.8 \text{ kJ mol}^{-1}$ .

### Calculation of number of $\text{H}_2$ molecule of CIS-BOI composite <sup>1</sup>

Volume of  $\text{H}_2$  gas liberated in reaction = 13.2 mL = 0.013 L

Standard gas equation is  $PV = nRT$

(Where  $n$  = no. of moles,  $P$  = pressure at standard condition = 1 atm,  $V$  = volume of gas,  $R$  = gas constant = 0.082 L.atm mol<sup>-1</sup> K<sup>-1</sup>,  $T$  = standard temperature = 298 K)

$$\Rightarrow n = (0.0138 \text{ L} \times 1 \text{ atm}) / (0.082 \text{ L.atm mol}^{-1} \text{ K}^{-1} \times 298 \text{ K})$$

$$\Rightarrow n = 0.0005647 \text{ moles h}^{-1}$$

$$1 \text{ mole H}_2 \text{ gas} = 6.023 \times 10^{23} \text{ molecules}$$

$$0.0005647 \text{ moles H}_2 \text{ gas} = 6.023 \times 10^{23} \times 0.0005647$$

$$\text{Number of H}_2 \text{ molecule (per s)} = (6.023 \times 10^{23} \times 0.0005647) / (60 \text{ min} \times 60 \text{ s})$$

$$= 9.44 \times 10^{16} \text{ per sec}$$

### Calculation of number of $\text{H}_2$ molecule of pristine CIS QD

Volume of  $\text{H}_2$  gas liberated in reaction = 5.2 mL = 0.00521 L

Standard gas equation is  $PV = nRT$

$$\Rightarrow n = (0.00521 \text{ L} \times 1 \text{ atm}) / (0.082 \text{ L.atm mol}^{-1} \text{ K}^{-1} \times 298 \text{ K})$$

$$\Rightarrow n = 0.0002132 \text{ moles h}^{-1}$$

$$1 \text{ mole H}_2 \text{ gas} = 6.023 \times 10^{23} \text{ molecules}$$

$$0.0002132 \text{ moles H}_2 \text{ gas} = 6.023 \times 10^{23} \times 0.0002132$$

$$\text{Number of H}_2 \text{ molecule (per s)} = (6.023 \times 10^{23} \times 0.0001686) / (60 \text{ min} \times 60 \text{ s})$$

$$= 3.56 \times 10^{16} \text{ per sec}$$

### O<sub>2</sub> Evolution

#### Calculation of ACE of 15% CIS-BOI composite

$$\text{ACE} = \frac{\text{Stored chemical energy}}{\text{Incident light intensity}} \times 100$$

$$\Rightarrow \text{Stored chemical energy} = \text{moles of O}_2 \text{ produced} \times \Delta H_c$$

$$= 0.1585 \times 10^{-6} \mu\text{mols}^{-1} \times 285.8 \text{ kJmol}^{-1} = 0.0453 \text{ Js}^{-1} \text{ or W}$$

$$\Rightarrow \text{Incident light intensity} = 70 \text{ mW cm}^{-2}$$

$$\times (\text{Area of the spherical surface where light falls})$$

$$= 70 \text{ mW cm}^{-2} \times 3.141 \times 1.5 \text{ cm} \times 1.5 \text{ cm} = 0.4947 \text{ W}$$

$$\Rightarrow \text{ACE} = \frac{0.0453 \text{ W}}{0.4947 \text{ W}} \times 100 = 9.16\%$$

Where,  $\Delta H_c$  = Heat of combustion of H<sub>2</sub> = 285.8 kJ/mol.

#### Calculation of ACE of pristine BOI MP

$$\text{ACE} = \frac{\text{Stored chemical energy}}{\text{Incident light intensity}} \times 100$$

$$\Rightarrow \text{Stored chemical energy} = \text{moles of O}_2 \text{ produced} \times \Delta H_c$$

$$= 0.0531 \mu\text{mols}^{-1} \times 285.8 \text{ kJmol}^{-1} = 0.0151 \text{ Js}^{-1} \text{ or W}$$

$$\Rightarrow \text{Incident light intensity} = 70 \text{ mW cm}^{-2}$$

$$\times (\text{Area of the spherical surface where light falls})$$

$$= 70 \text{ mW cm}^{-2} \times 3.141 \times 1.5 \text{ cm} \times 1.5 \text{ cm} = 0.4947 \text{ W}$$

$$\Rightarrow \text{ACE} = \frac{0.0151 \text{ W}}{0.4947 \text{ W}} \times 100 = 3.06\%$$

Where,  $\Delta H_c$  = Enthalpy of combustion of  $\text{H}_2$  = 285.8  $\text{kJ mol}^{-1}$ .

### **Calculation of number of $\text{O}_2$ molecule of 15% CIS-BOI composite**

Volume of  $\text{O}_2$  gas liberated in reaction = 12.8 mL = 0.0128 L

Standard gas equation is  $PV = nRT$

(Where  $n$  = no. of moles,  $P$  = pressure at standard condition = 1 atm,  $V$  = volume of gas,  $R$  = gas constant = 0.082  $\text{L.atm mol}^{-1} \text{K}^{-1}$ ,  $T$  = standard temperature = 298 K)

$$\Rightarrow n = (0.0128 \text{ L} \times 1 \text{ atm}) / (0.082 \text{ L.atm mol}^{-1} \text{K}^{-1} \times 298 \text{ K})$$

$$\Rightarrow n = 0.0005238 \text{ moles h}^{-1}$$

$$1 \text{ mole } \text{O}_2 \text{ gas} = 6.023 \times 10^{23} \text{ molecules}$$

$$0.0005238 \text{ moles } \text{O}_2 \text{ gas} = 6.023 \times 10^{23} \times 0.0005238$$

$$\begin{aligned} \text{Number of } \text{O}_2 \text{ molecule (per s)} &= (6.023 \times 10^{23} \times 0.0005647) / (60 \text{ min} \times 60 \text{ s}) \\ &= \mathbf{8.76 \times 10^{16} \text{ per sec}} \end{aligned}$$

### **Calculation of number of $\text{O}_2$ molecule of pristine BOI MP**

Volume of  $\text{O}_2$  gas liberated in reaction = 4.28 mL = 0.00428 L

Standard gas equation is  $PV = nRT$

$$\Rightarrow n = (0.00428 \text{ L} \times 1 \text{ atm}) / (0.082 \text{ L.atm mol}^{-1} \text{K}^{-1} \times 298 \text{ K})$$

$$\Rightarrow n = 0.0001751 \text{ moles h}^{-1}$$

$$1 \text{ mole } \text{O}_2 \text{ gas} = 6.023 \times 10^{23} \text{ molecules}$$

$$0.0001751 \text{ moles O}_2 \text{ gas} = 6.023 \times 10^{23} \times 0.0001751$$

$$\text{Number of O}_2 \text{ molecule (per s)} = (6.023 \times 10^{23} \times 0.0001751) / (60 \text{ min} \times 60 \text{ s})$$

$$= 2.93 \times 10^{16} \text{ per sec}$$

Table: S2 Comparison table for photocatalytic H<sub>2</sub> generation of CIS based composites and photocatalytic O<sub>2</sub> evolution of BOI based composites.

| Sl. No | Type of catalytic reaction                                      | Photocatalysts                                                 | Light Source/ Scavenger                                                                                                           | Hydrogen Evolution ( $\mu\text{molg}^{-1}\text{h}^{-1}$ ) | Reference |
|--------|-----------------------------------------------------------------|----------------------------------------------------------------|-----------------------------------------------------------------------------------------------------------------------------------|-----------------------------------------------------------|-----------|
| 1      | <b>CIS-Based Photocatalysts Towards H<sub>2</sub> Evolution</b> | CuInS <sub>2</sub> -CN                                         | -----                                                                                                                             | 192                                                       | 2         |
| 2      |                                                                 | CuInS <sub>2</sub> - ZnIn <sub>2</sub> S <sub>4</sub>          | 300 W Xenon lamp<br>( $\lambda \geq 420 \text{ nm}$ ) 0.25 mol/L Na <sub>2</sub> S and 0.35 mol/L Na <sub>2</sub> SO <sub>3</sub> | 292                                                       | 3         |
| 3      |                                                                 | ZnIn <sub>2</sub> S <sub>4</sub> -rGO-<br>CuInS <sub>2</sub>   | 150 W Xenon lamp<br>( $\lambda \geq 420 \text{ nm}$ ) 50 mL Na <sub>2</sub> S/Na <sub>2</sub> SO <sub>3</sub> (10 volume %)       | 506.2                                                     | 4         |
| 4      |                                                                 | CuInS <sub>2</sub> /TiO <sub>2</sub> /Mo<br>S <sub>2</sub>     | 300 W Xenon lamp ( $\lambda > 420 \text{ nm}$ ), 250 mL of 0.1 M Na <sub>2</sub> S/Na <sub>2</sub> SO <sub>3</sub>                | 10.34*10 <sup>2</sup>                                     | 5         |
| 5      |                                                                 | ZnIn <sub>2</sub> S <sub>4</sub> /CuInS <sub>2</sub><br>-QD-Pt | 1000 W Xenon lamp ( $\lambda > 420 \text{ nm}$ ), 80 mL of 0.35 M Na <sub>2</sub> S/0.25 M Na <sub>2</sub> SO <sub>3</sub>        | 411.17                                                    | 6         |
| 6      |                                                                 | CuInS <sub>2</sub> QD/ZnS                                      | 3 mW LED ( $\lambda = 405 \text{ nm}$ ), 1                                                                                        | 16.45*10 <sup>2</sup>                                     | 7         |

|    |  |                                                |                                                                                           |                        |           |
|----|--|------------------------------------------------|-------------------------------------------------------------------------------------------|------------------------|-----------|
|    |  |                                                | mL of 0.2M ascorbic acid solution (pH = 5)                                                |                        |           |
| 7  |  | CuInS <sub>2</sub> /TiO <sub>2</sub>           | 300 W Xe lamp, 100 mL of 0.55 M Na <sub>2</sub> S /0.25 M Na <sub>2</sub> SO <sub>3</sub> | 785.4                  | 8         |
| 8  |  | CuInS <sub>2</sub> QD/ZnS                      | 150 W xenon lamp ( $\lambda$ =400-700 nm), 5 mL of 0.5 M sodium ascorbate/ascorbic acid   | 15.90*10 <sup>2</sup>  | 9         |
| 9  |  | Zn dopped-CuInS <sub>2</sub> QD                | 300 W Xe-lamp ( $\lambda$ =400–780 nm), 0.2 M Ascorbic Acid at pH=5                       | 14.4*10 <sup>3</sup>   | 10        |
| 10 |  | Ni-catalyzed Cu <sub>x</sub> In <sub>y</sub> S | 3 W LED light ( $\lambda$ = 470 nm), 0.5 M H <sub>2</sub> A/NaHA                          | 11.6 *10 <sup>3</sup>  | 11        |
| 11 |  | Cu <sub>0.75</sub> In <sub>0.25</sub> S-BOI MF | 125 W Xe-lamp ( $\lambda$ > 420 nm), Methanol (10 volume %)                               | 29.436*10 <sup>3</sup> | 12        |
| 12 |  | CuInS <sub>2</sub> QD-BOI                      | 125 W Xe-lamp ( $\lambda$ > 420 nm), Methanol (10 volume %)                               | 30.774*10 <sup>3</sup> | This work |

|    |                                                                 |                                  |                                                                         |                        |           |
|----|-----------------------------------------------------------------|----------------------------------|-------------------------------------------------------------------------|------------------------|-----------|
| 13 | <b>BOI-Based Photocatalysts Towards O<sub>2</sub> Evolution</b> | BiOI-CeO <sub>2</sub>            | 125 W Hg-lamp ( $\lambda > 420$ nm),<br>20mL of 0.05M AgNO <sub>3</sub> | 8075                   | 13        |
| 14 |                                                                 | RuO <sub>2</sub> -loaded<br>BiOI | 300 W Xenon lamp ( $\lambda > 420$ nm), 0.05M AgNO <sub>3</sub>         | 2730                   | 14        |
| 15 |                                                                 | CuInS <sub>2</sub> QD/BOI<br>MP  | 125 W Xe-lamp ( $\lambda > 420$ nm), Methanol (10 volume %)             | 28.544*10 <sup>3</sup> | This work |

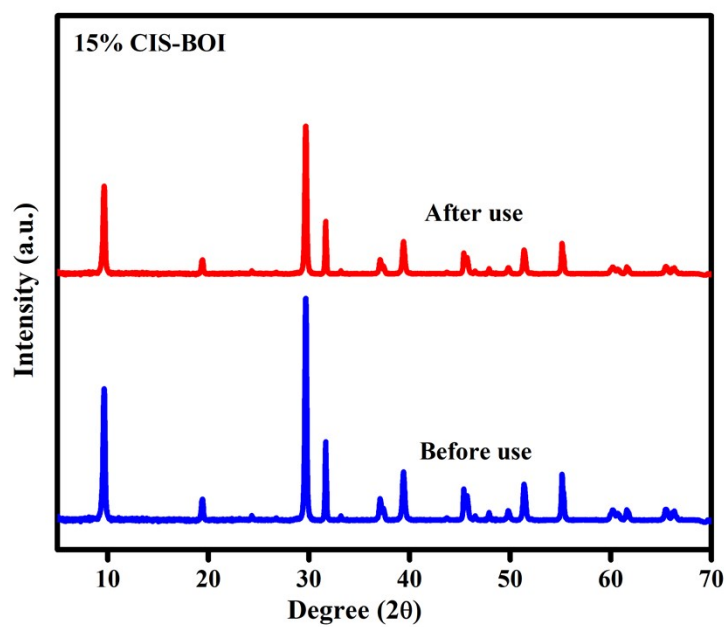

Fig. S4: XRD of 15% CIS-BOI before and after used.

## Reference

1. S. Mansingh, S. Subudhi, S. Sultana, G. Swain, and K. Parida, *ACS Appl. Nano.*, 2021, **4**, 9635-9652.
2. Y. Zheng, Y. Chen, B. Gao, J. Chen, Z. Du, and B. Lin, *Mater. Lett.*, 2019, **254**, 81–84.
3. X. Guo, Y. Peng, G. Liu, G. Xie, Y. Guo, Y. Zhang, and J. Yu, *J. Phys. Chem. C*, 2020, **124**, 5934–5943.
4. A. Raja, N. Son, M. Swaminathan and M. Kang, *J. Colloid Interface Sci.*, 2021, **602**, 669–679.
5. Y.-J. Yuan, G. Fang, D. Chen, Y. Huang, L.-X. Yang, *et al. Dalton Trans.*, 2018, **47**, 5652-5659.
6. O. Cavdar, A. Malankowska, D. Amgar, P. Mazierski, J. Luczak, *et al. Int. J. Hydrog. Energ.*, 2021, **46**, 486-498
7. W. Hu, S. Yang, and J. Huang, *J. Chem. Phys.*, 2019, **151**, 214705.
8. Y. Yana, M. Yanga, H. Shia, C. Wang, J. Fanb, E. Liua, and X. Hu, *Ceram. Int.* 2019, **45**, 6093-6101.
9. M. Sandroni, R. Gueret, K. D. Wegner, P. Reiss, J. Fortage, D. Aldakov, and M.-N. Collomb, *Energy Environ. Sci.* **2018**, *11*, 1752-1761.
10. X.-Y. Liu, G. Zhang, H. Chen, Haowen. Li, J. Jiang, Y.-T. Long, and Z. Ning, *Nano Research*, 2018, **11**, 1379–1388.
11. X.-B. Fan, S. Yu, F. Zhan, Z.-J. Li, and Y.-J. Gao, *Chem. Sus. Chem.*, 2017, **10**, 1–7.
12. D. Prusty, S. Mansingh, L. Acharya, and L. Paramanik, K. M. Parida, *RSC Adv.* 2022, **12**, 1265.
13. S. Sultana, S. Mansingh, and K. M. Parida, *J. Phys. Chem. C*, 2018, **122**, 808–819.
14. T.-H. Chen, M. Yoshida, S. Tsunekawa, J.-H. Wu, K. L. Andrew, and Hu, C. *Catal. Sci. Technol.* 2020, **10**, 3223-3231.
